# Supplementary material
Source: PubMed Central journal article supplement (PMC3743101)
Supplement: NIHMS494278-supplement-01.pdf [file NIHMS494278-supplement-01.pdf]

# Supplementary Figure 1

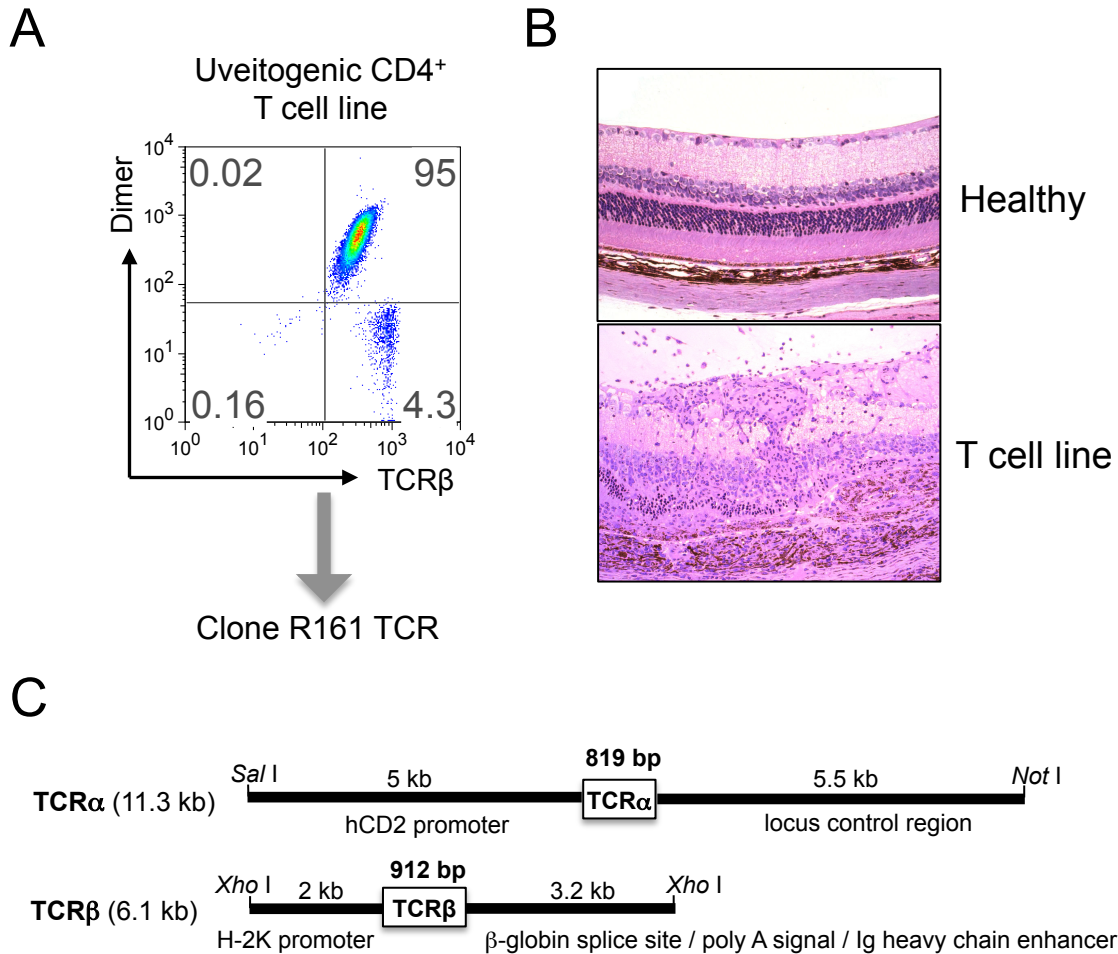

**Figure S1. Cloning and vector construction of IRBP-specific TCR  $\alpha$  and  $\beta$  chains to generate IRBP-specific TCR transgenic (R161) mice.**

**A.** IRBP<sub>161-180</sub>-specific CD4<sup>+</sup> T cell line was established from lymphocytes of B10.RIII WT mice that had been immunized for EAU. The cell line binds to IRBP-specific MHCII-Ig dimer (95% positive). R161 TCR was cloned from this line. **B.** Severe EAU was induced in naïve mice by  $0.1 \sim 1 \times 10^6$  cells from the uveitogenic T cell line. Compare the histology to healthy retina (original mag. x200). **C.** The cloned TCR $\alpha$  and  $\beta$  cDNAs were placed under the control of human CD2 promoter and mouse H-2K promoter, respectively, using plasmid constructs described by Zhumabekov, et al, (27) and Pircher et al (28).
