# Supplementary material
Source: PubMed Central journal article supplement (PMC3743101)
Supplement: NIHMS494278-supplement-03.pdf [file NIHMS494278-supplement-03.pdf]

# Supplementary Figure 3

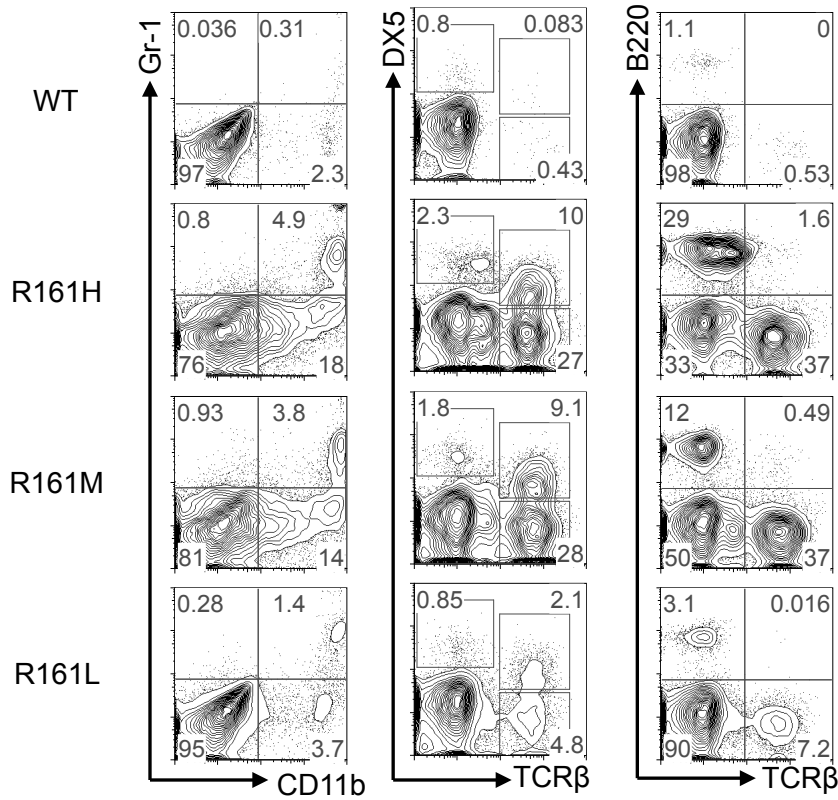

**Figure S3. Phenotypic analysis of infiltrating cells of uveitic eye from R161 mouse lines.**

Ocular infiltrating cells from uveitic R161 lines include granulocytes/neutrophils (Gr1<sup>+</sup>CD11b<sup>+</sup>), NK (DX5<sup>+</sup>TCRβ<sup>-</sup>), NKT (DX5<sup>+</sup>TCRβ<sup>+</sup>), T cells and B cells. These inflammatory cells were rarely detected in healthy WT eyes. Gated on total live cell populations.
