# Supplementary material
Source: PubMed Central journal article supplement (PMC3743101)
Supplement: NIHMS494278-supplement-04.pdf [file NIHMS494278-supplement-04.pdf]

# Supplementary Figure 4

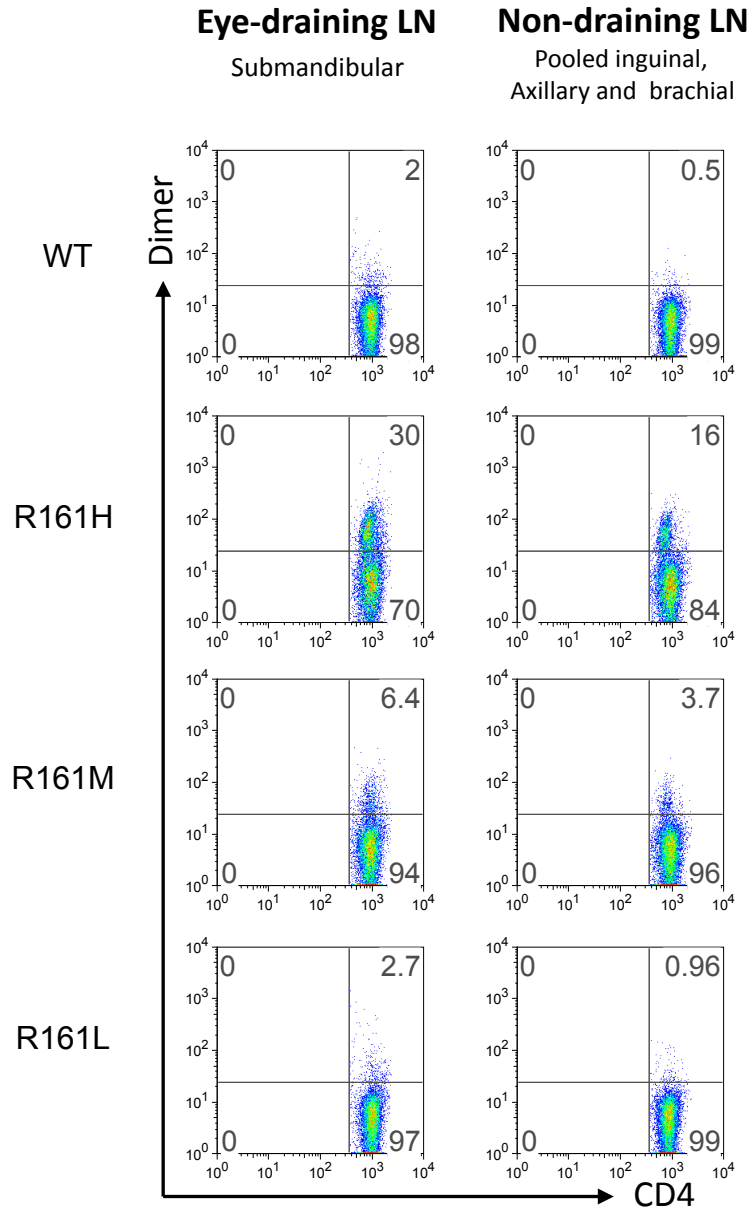

**Figure S4. Frequencies of Ag-specific T cells in eye-draining and non-draining lymph nodes of R161 lines. Shown are the populations gated on CD4.**
